# Supplementary material for: Effect of Electronic and Mail Outreach From Primary Care Physicians for COVID-19 Vaccination of Black and Latino Older Adults: A Randomized Clinical Trial
Source: PubMed Central journal article supplement — JAMA Netw Open. 2022 Jun 17;5(6):e2217004. doi: 10.1001/jamanetworkopen.2022.17004 (PMC9206195; doi:10.1001/jamanetworkopen.2022.17004), 2022-06-17
Supplement: jamanetwopen-e2217004-s00.pdf [file jamanetwopen-e2217004-s00.pdf]

## Data Sharing Statement

Lieu. Effect of Electronic and Mail Outreach From Primary Care Physicians for COVID-19 Vaccination of Black and Latino Older Adults. *JAMA Netw Open*. Published June 17, 2022. doi:10.1001/jamanetworkopen.2022.17004

### Data

**Data available:** No

### Additional Information

**Explanation for why data not available:** For confidentiality reasons, we would need to invest a large amount of effort in de-identifying the data from this very large sample. Because this study was initiated as a quality improvement effort, we do not have the resources to do this. However, researchers may contact the first author if they are interested in seeking data access under existing research and data sharing protocols.
